# Supplementary material for: Using kinetic energy measurements from altimetry to detect shifts in the positions of fronts in the Southern Ocean
Source: Copernicus journal article supplement (doi:10.5194/os-2017-57), 2017-07-20
Supplement: Supplementary file [file os-2017-57-AC1-supplement.pdf]

1 **Using kinetic energy measurements from altimetry to detect shifts in the**  
2 **positions of fronts in the Southern Ocean**

3 Don P. Chambers<sup>1</sup>

4 <sup>1</sup> College of Marine Science, University of South Florida, St. Petersburg, FL

5 Correspondence to: D. Chambers ([donc@usf.edu](mailto:donc@usf.edu))

6

7 **Abstract.** A novel analysis is performed utilizing cross-track kinetic energy (CKE) computed

8 from [along-track](#) sea surface height anomalies. The mid-point of enhanced kinetic energy  
9 averaged over three-year periods from 1993 to [2016](#) is determined across the Southern Ocean

10 and examined to detect shifts in frontal positions, based on previous observations that kinetic

11 energy [is high around fronts in the Antarctic Circumpolar Current system due to jet instabilities](#). It

12 is demonstrated that although the CKE does not represent the full eddy kinetic energy (computed

13 from crossovers), the shape of the enhanced regions along groundtracks is the same, and CKE

14 has a much finer spatial sampling of 6.9 km. Results indicate no significant shift in the front

15 positions across the Southern Ocean, on average, although there are some localized, large

16 movements. This is consistent with other studies utilizing sea surface temperature gradients, the

17 latitude of mean transport, [and probability of jet occurrence](#), but [is](#) inconsistent with studies

18 utilizing the movement of contours of dynamic topography.

Don Chambers 10/12/2017 9:38 AM

**Deleted:** derived from along-track satellite altimetry

Don Chambers 9/25/2017 11:43 AM

**Deleted:** 2015

Don Chambers 9/25/2017 11:43 AM

**Deleted:** is largest

Don Chambers 9/25/2017 11:44 AM

**Deleted:** along

Don Chambers 9/25/2017 11:44 AM

**Deleted:** fronts and jets

Don Chambers 9/25/2017 11:44 AM

**Deleted:** in the Antarctic Circumpolar Current system

Don Chambers 10/12/2017 9:38 AM

**Deleted:** and

28 **1. INTRODUCTION**

29 There is as much we don't know about the circulation of the Southern Ocean as we do.  
30 Although the current system is routinely called the Antarctic Circumpolar Current (ACC), it  
31 consists of several fronts with distinct water properties to the north and south of the fronts  
32 (Nowlin and Clifford, 1982; Orsi et al., 1995; Belkin and Gordon, 1996). The most significant of  
33 these fronts, responsible for the majority of the ACC volume transport (e.g., Cunningham et al.,  
34 2003), are the Subantarctic Front (SAF) and the Polar Front (PF). However, even this is not a  
35 realistic picture of the circulation in the Southern Ocean, since at any specific time, there can be  
36 from three to ~~ten~~ narrow jets around the fronts that are highly variable in strength and location,  
37 masking the specific frontal boundary (Sokolov and Rintoul, 2007, 2009a, 2009b; Saltee et al.,  
38 2008; Thompson et al., 2010; Thompson and Richards, 2011; Langlais et al., 2011; Graham et  
39 al., 2012; Chapman, 2014; Gille, 2014; Kim and Orsi, 2014; Shao et al., 2015; Chapman, 2017a).  
40 Although positions of fronts have been estimated throughout the Southern Ocean, primarily  
41 using gradients of subsurface density measured from hydrographic sections (Orsi et al., 1995),  
42 contours of dynamic topography (Sokolov and Rintoul 2007, 2009a, 2009b; Langlais et al.,  
43 2011), or a combination Kim and Orsi (2014), in many places there are no strong currents that  
44 can be measured near the front position (Chapman, 2014; 2017a).

45 Because of the highly variable nature of jets and the lack of clear observational detection of  
46 fronts in some areas, the literature has become muddled over the difference between a front and a  
47 jet, primarily because the "front" is rarely observed at any specific time due to the high-  
48 variability of jets (Thompson et al., 2010; Thompson and Richards, 2011; Chapman 2014;  
49 2017a). However, even in the presence of highly variable jets, methods have been developed to  
50 determine mean fronts positions in a probabilistic sense. Thompson et al. (2010) demonstrated

Don Chambers 10/11/2017 1:07 PM  
**Deleted:** we now know the circulation along these fronts is not a well-defined single current, but

Don Chambers 10/11/2017 1:07 PM  
**Deleted:** instead consists of anywhere

Don Chambers 9/21/2017 2:46 PM  
**Deleted:** four

Don Chambers 10/11/2017 1:07 PM  
**Deleted:** per front

Don Chambers 10/11/2017 1:08 PM  
**Deleted:** ,

58 | [one could define fronts in the Southern Ocean by computing probability density functions of](#)  
59 | [potential vorticity in an eddy-resolving general ocean circulation model. Chapman \(2014, 2017a\)](#)  
60 | [later showed this could also be done using localized gradients in dynamic topography \(i.e., high](#)  
61 | [geostrophic velocity\) using satellite altimeter observations, but again, only as statistical](#)  
62 | [probability. This is because these areas of enhanced gradients and velocity are more reflective of](#)  
63 | [jets, which strengthen and die, appear and disappear, bifurcate and join back together. Because of](#)  
64 | [this, they can only be detected on average 10-15% of the time. However, Chapman \(2014,](#)  
65 | [2017a\) has demonstrated that, at least in a mean sense, fronts defined by mean dynamic](#)  
66 | [topography contours \(commonly known as the “contour method”\) do lie within the probability](#)  
67 | [distribution inferred from “gradient” methods.](#)

68 | An open question is how the [fronts and jets](#) that comprise the ACC will respond in a  
69 | warming climate. Analysis of climate models [\(which cannot simulate jets in the Southern Ocean\)](#)  
70 | suggests that as the atmosphere warms, the winds that drive the fronts [and jets](#) of the ACC will  
71 | migrate south (e.g., Fyfe and Saenko, 2006; Swart and Fyfe, 2012). It should be noted, however,  
72 | that the mean position of the southern hemisphere westerlies in the models lies significantly  
73 | equatorward of the true position [\(e.g., Figure 2 in Fyfe and Saenko, 2006\)](#). Thus, it is not entirely  
74 | clear whether the model is predicting a true shift in the wind position, or whether the model has  
75 | not yet reached equilibrium with winds in the proper location.

76 | Still, based on these model results, researchers have been testing [the](#) hypothesis that as winds  
77 | in the Southern Ocean shift south, the frontal positions and jets will also migrate south. So far,  
78 | the results are mixed. [Using the contour method and tracking how the dynamic topography](#)  
79 | [contours associated with a front position shift in time, Sokolov and Rintoul \(2009b\) found that](#)  
80 | [the SAF and PF had both moved south by approximately 60 km over 15 years between 1993 and](#)

Don Chambers 9/22/2017 10:44 AM

Deleted: fronts/jets

Don Chambers 9/22/2017 10:55 AM

Deleted: /

Don Chambers 9/22/2017 10:55 AM

Deleted: a

Don Chambers 9/22/2017 10:58 AM

Deleted: 2009a,

Don Chambers 9/22/2017 10:57 AM

Deleted: proposed a method based on finding the contour of a mean dynamic topography associated with the steepest meridional gradient of dynamic topography (i.e., zonal geostrophic current) and associate this with a front or jet. They could then track the latitude of that contour over time to deduce if the front had moved. When averaged over all longitudes, their analysis indicated

Don Chambers 9/22/2017 10:57 AM

Deleted: that

2008, Kim and Orsi (2014) recently updated this analysis and found that while the average frontal position across the Southern Ocean indicates a strong southward shift, this is due primarily to substantial shifts only in the Indian Ocean sector. They found no significant shifts throughout the Pacific or Atlantic Ocean sectors using the contour method.

The primary assumption of these analyses is that if a contour of dynamic topography shifts south, it is uniquely caused by a front moving south. This is not necessarily true. Gille (2014) recently demonstrated that all contours in the Southern Ocean have shifted south on average, and that this follows from the observed rise in sea level – as the sea surface height rises, the contours will appear to shift south. While this breaks down at the far south and north of the ACC where dynamic topography gradients are small, these areas are far away from the PF and SAF and so have not been considered in previous analyses. Gille (2014) used a different measure to determine the position of the ACC fronts, based on the latitude of the mean surface transport of the ACC measured by altimetry, which is in essence a mean location of all the jets in the Southern Ocean. She found no significant shift on average, but considerable interannual variability, especially regionally.

Another factor other than sea level rise can cause the dynamic topography contour to shift south -- if the magnitude and width of the jet has changed. This is demonstrated in Figure 1, where we show the mean dynamic topography from two jet scenarios: 1) where the peak of two Gaussian shaped jets have shifted south, and 2) where the peak has not shifted, but the magnitude has decreased, the width has broadened, and the shape has become slightly skewed. Although the resulting topography profiles are not identical, they are similar, and both suggest a southward movement of dynamic topography contours.

- Don Chambers 10/11/2017 1:11 PM  
**Deleted:** )
- Don Chambers 10/11/2017 1:11 PM  
**Deleted:** to
- Don Chambers 10/11/2017 1:11 PM  
**Deleted:** is
- Don Chambers 9/22/2017 10:59 AM  
**Deleted:** (Sokolov and Rintoul, 2009b).
- Don Chambers 9/22/2017 11:01 AM  
**Deleted:** While this method is nice because it allows one to determine a front position even when gradients are small due to continuity of the contour line and is less contaminated with errors such as those based on methods that examine gradients alone (e.g., Chapman, 2014), it has several issues because of several assumptions made. First, it assumes that the average of the position shift of the contours across all longitudes represents the shift ... [1]
- Don Chambers 9/22/2017 11:01 AM  
**Deleted:** assumes that
- Don Chambers 9/22/2017 11:01 AM  
**Deleted:** shifting
- Don Chambers 9/22/2017 11:01 AM  
**Deleted:** is unique to a
- Don Chambers 9/22/2017 11:01 AM  
**Deleted:** front/jet axis
- Don Chambers 10/11/2017 1:12 PM  
**Deleted:** n
- Don Chambers 9/22/2017 11:04 AM  
**Deleted:** and found
- Don Chambers 9/22/2017 11:04 AM  
**Deleted:** but
- Don Chambers 9/22/2017 11:05 AM  
**Deleted:** The third assumption is that ... [2]
- Don Chambers 9/22/2017 11:05 AM  
**Deleted:**
- Don Chambers 9/22/2017 11:05 AM  
**Deleted:** has shifted south but that the
- Don Chambers 9/22/2017 11:06 AM  
**Deleted:** not
- Don Chambers 9/22/2017 11:06 AM  
**Deleted:** e problem with this
- Don Chambers 9/22/2017 11:06 AM  
**Deleted:** assumption
- Don Chambers 9/22/2017 11:06 AM  
**Deleted:** (MDT)
- Don Chambers 9/22/2017 11:06 AM  
**Deleted:** MDT
- Don Chambers 9/22/2017 11:06 AM  
**Deleted:** MDT

169 Researchers using other methods also find little or no southern migration of the fronts or jets  
170 in the Southern Ocean as a whole. Graham et al. (2012) used a high-resolution model to show  
171 that the Polar Front and Subantarctic Front are constrained by bathymetry, even in increasing and  
172 shifting winds. Shao et al. (2015) utilized the skewness of sea level anomalies to identify front  
173 positions, and found no southward motion, but did find changes in the east Pacific correlated  
174 with the Southern Annual Mode. Chapman (2017a), using positions of fronts determined from  
175 the probability of jet locations, also found no significant southward movement, but high  
176 interannual variability. Finally, Freeman and Lovenduski (2016a) used weekly estimates of the  
177 Polar Front position determined from satellite sea surface temperature (SST) gradients to show  
178 no significant southward shift between 2002 and 2014 on average, except in the Indian Ocean.  
179 They also found a statistically significant northward shift of the PF in part of the south Pacific.

180 Thus, recent studies all agree that the Subantarctic Front and Polar Front have not shifted  
181 south, even though there is evidence the winds have shifted south in the austral summer months  
182 (Swart and Fyfe, 2012). It should be noted that when averaged over the full calendar year,  
183 however, there has been no significant shift in the wind position (Swart and Fyfe, 2012).

184 In this paper, we develop a new method to study variability in the position of the fronts in the  
185 Southern Ocean, based on tracking the location of envelopes of kinetic energy measured by  
186 satellite altimetry. It is known from modeling studies that the front positions are associated with  
187 increased kinetic energy, due to instabilities in the jets and interactions with bathymetry  
188 (Thompson et al., 2010; Thompson and Richards, 2011). After demonstrating that kinetic energy  
189 computed from along-track satellite altimetry forms relatively wide envelopes of enhanced  
190 energy that occur within the probability range of jets and fronts (e.g., Chapman, 2017a), we track  
191 the positions of these envelopes from 1993 until 2016 to quantify if the envelopes have shifted

Don Chambers 10/11/2017 1:13 PM  
**Deleted:** Gille (2014) found no significant change in the latitude of mean transport of the surface currents in the ACC.

Don Chambers 10/3/2017 12:04 PM  
**Deleted:** Freeman et al.

Don Chambers 9/22/2017 11:22 AM  
**Deleted:** measurements

Don Chambers 9/22/2017 11:23 AM  
**Deleted:** (similar to Kim and Orsi, 2014) and a

Don Chambers 9/22/2017 2:09 PM  
**Deleted:** Here,

Don Chambers 9/22/2017 2:23 PM  
**Formatted:** Indent: First line: 0.25"

Don Chambers 9/26/2017 10:59 AM  
**Deleted:** will utilize

Don Chambers 9/22/2017 2:10 PM  
**Deleted:** the

Don Chambers 9/22/2017 2:10 PM  
**Deleted:** eddy

Don Chambers 9/22/2017 2:10 PM  
**Deleted:** (EKE)

Don Chambers 9/22/2017 2:10 PM  
**Deleted:** EKE

Don Chambers 10/11/2017 1:15 PM  
**Deleted:** is

Don Chambers 10/11/2017 1:15 PM  
**Deleted:** s

207 south by a statistically significant amount. This is based on the assumption that if the front and  
208 jets around the front have shifted south, then the envelope of high kinetic energy should also  
209 move by a comparable amount. Since the kinetic energy calculation is based on estimating  
210 gradients of sea level anomalies, this approach is similar to other gradient methods for detecting  
211 fronts or jets (e.g., Chapman, 2014; 2017a; Gille, 2014; Freeman and Lovenduski, 2016a). It  
212 differs from these approaches, however, in that instead of determining individual gradients and  
213 tracking these over time, it looks for regions of high gradients (i.e., high energy) surround by  
214 regions of low gradient (i.e., low energy). This allows us to detect envelopes for every time-  
215 period considered, instead of only a fraction of the time, allowing for better tracking of the  
216 change over time.

217 Section 2 will describe the data and methods used, while section 3 will present results,  
218 including evaluation of the method for detecting mean positions of fronts and for tracking their  
219 change over time. Section 4 will discuss the results in the context of previous studies and  
220 evaluate the usefulness of the method.

## 221 2. DATA AND METHODS

222 We utilize geostrophic surface current anomalies computed from the 24-year record of 1-Hz  
223 sea surface height (SSH) data along the TOPEX/Poseidon (T/P) groundtrack in the Southern  
224 Ocean (Figure 2). The altimetry data used are from four separate altimeter missions:  
225 TOPEX/Poseidon (January 1993 – January 2002), Jason-1 (February 2002 – July 2008), Jason-2  
226 (August 2008 – August 2016), and Jason-3 (August 2016 – December 2016). Because the  
227 official TOPEX/Poseidon (T/P) geophysical data records (GDRs) have not been updated since  
228 the late 1990s, we utilize the corrected data products from the Integrated Multi-Mission Ocean  
229 Altimeter Data for Climate Research provided by Beckley et al. (2010) at the NASA PO.DAAC

Don Chambers 10/11/2017 1:21 PM

Deleted: s

Don Chambers 10/11/2017 1:21 PM

Deleted: also depends on

Don Chambers 9/22/2017 2:23 PM

Deleted: Thus, it is reasonable to assume that if the front position has shifted that the region of high EKE should also shift by a comparable amount.

Don Chambers 9/22/2017 2:25 PM

Deleted:

Don Chambers 10/11/2017 1:24 PM

Deleted: (January 1993 through December 2016) from the TOPEX/Poseidon, Jason-1, and Jason-2, and Jason-3

Don Chambers 10/11/2017 1:24 PM

Formatted: Normal, No widow/orphan control, Tabs: 2", Left + 6.5", Right

Don Chambers 9/22/2017 2:25 PM

Deleted: will

Don Chambers 9/22/2017 2:25 PM

Deleted: 3

Don Chambers 10/11/2017 1:24 PM

Deleted: each

Don Chambers 10/11/2017 1:24 PM

Deleted: -

244 [site \(https://podaac.jpl.nasa.gov/Integrated\\_Multi-Mission\\_Ocean\\_AltimeterData\)](https://podaac.jpl.nasa.gov/Integrated_Multi-Mission_Ocean_AltimeterData). Jason-1 data  
245 [are from the GDR-C version and were downloaded from the NASA PO.DAAC site in June 2010.](#)  
246 [Jason-2 are from the GDR-D version and were downloaded from NOAA NODC](#)  
247  [\(ftp://ftp.nodc.noaa.gov/pub/data.nodc/jason2\)](ftp://ftp.nodc.noaa.gov/pub/data.nodc/jason2) between August 2012 and June 2016. Jason-3 are  
248 [also from the GDR-D version and were downloaded from NOAA NODC](#)  
249  [\(ftp://ftp.nodc.noaa.gov/pub/data.nodc/jason3\)](ftp://ftp.nodc.noaa.gov/pub/data.nodc/jason3) on August 7 and 8, 2017.

250 [We utilize the 1-Hz along-track SSH data from the four altimeters and compute sea level](#)  
251 [anomalies by interpolating the DTU10 mean sea surface model \(Andersen and Knudsen, 2009;](#)  
252 [http://www.space.dtu.dk/english/Research/Scientific\\_data\\_and\\_models/downloaddata\)](http://www.space.dtu.dk/english/Research/Scientific_data_and_models/downloaddata) to the  
253 [SSH location using bilinear interpolation. The DTU10 mean sea surface model is based on SSH](#)  
254 [from multiple altimeters averaged over 17 years in a rigorous and consistent manner \(Andersen](#)  
255 [and Knudsen, 2009\). T/P, Jason-1, and Jason-2 data were all included. All recommended](#)  
256 [geophysical and surface corrections \(e.g., water vapor, ionosphere, sea state bias, ocean tides,](#)  
257 [inverted barometer, etc\) have been applied, to correct for biases introduced by atmospheric](#)  
258 [signal refraction and sea state effects \(e.g., Chelton et al., 2001\).](#)

259 [We utilize this record rather than the gridded products based on mapping SSH from multiple](#)  
260 [altimeters \(e.g., Ducet et al., 2000; Pujol et al., 2016\), because the along-track data have a finer](#)  
261 [resolution in space \(6.9 km along the groundtrack\) and we recently demonstrated that the](#)  
262 [mapped altimetry data underestimated eddy kinetic energy \(EKE\) throughout the Southern](#)  
263 [Ocean compared to using along-track data by as much as 60-70% \(Hogg et al., 2015\). While the](#)  
264 [along-track sea level anomalies are filtered to reduce noise and thus may attenuate some signal,](#)  
265 [the filtering used \(described later in this section\), is less than that used for the mapped data,](#)  
266 [which uses observations from as long as 20 days and 200 km away to influence the mapped](#)

Don Chambers 9/25/2017 11:04 AM  
**Formatted:** Normal, No widow/orphan control, Tabs: 2", Left + 6.5", Right

Don Chambers 9/25/2017 10:57 AM  
**Deleted:** high

Don Chambers 9/22/2017 2:26 PM  
**Deleted:** Hogg et al. (2015)

Don Chambers 9/22/2017 2:27 PM  
**Deleted:** EKE

270 value. By filtering only alongtrack data, the time differences are small (a few minutes at most),  
 271 and the spatial influence is less than 100 km. Tests with unfiltered data accounting for estimated  
 272 random noise in the sea level anomaly data suggests attenuation of kinetic energy is minimal  
 273 with this approach and, more importantly, that the shape of the kinetic energy envelope does not  
 274 significantly change.

275 One can only compute EKE from alongtrack data at crossover points, where the ascending  
 276 and descending groundtracks cross (Figure 2). Knowing the groundtrack angle with the north  
 277 meridian ( $\theta$ ) one can compute the zonal ( $d\eta/dy$ ) and meridional gradients ( $d\eta/dx$ ) of SSHA  
 278 directly from the gradients of SSHA for the ascending pass ( $d\eta/dr_{asc}$ ) and descending pass  
 279 ( $d\eta/dr_{des}$ ) using simple geometry (Parke et al., 1987)

$$\frac{d\eta}{dy} = \frac{\left[ \frac{d\eta}{dr_{asc}} - \frac{d\eta}{dr_{des}} \right]}{2 \sin \theta}, \quad \frac{d\eta}{dx} = \frac{\left[ \frac{d\eta}{dr_{asc}} + \frac{d\eta}{dr_{des}} \right]}{2 \cos \theta} \quad (1)$$

281 noting that this formulation assumes the gradients represent the derivative of the northern SSHA  
 282 relative to the southern SSHA (for both the ascending and descending passes). Once this is  
 283 computed, the velocities can be computed directly from the zonal and meridional gradients:

$$u = -\frac{g}{f} \frac{d\eta}{dy}, \quad v = \frac{g}{f} \frac{d\eta}{dx} \quad (2)$$

285 where  $g$  is the acceleration due to gravity, and  $f$  is the Coriolis parameter

286 This formulation assumes that the velocity field has not changed significantly between the  
 287 times the two passes fly over the crossover point. At high latitudes, the majority of crossovers ( $\geq$   
 288 78%) have a time separation of less than 3 days. At  $40^\circ$ , the average propagation speed of an  
 289 eddy is about  $3 \text{ cm s}^{-1}$  [Chelton et al., 2007], meaning the eddy would have only been displaced

Don Chambers 9/22/2017 2:34 PM  
**Deleted:** due to attenuation from the large-scale correlation functions used in the mapping procedure. -  
 However, one

Don Chambers 10/11/2017 1:27 PM  
**Deleted:** However, one

Don Chambers 10/11/2017 1:27 PM  
**Deleted:** -

Unknown  
**Formatted:** Lowered by 15 pt

Unknown  
**Formatted:** Lowered by 15 pt

Don Chambers 9/25/2017 11:14 AM  
**Formatted:** Normal, Space After: 0 pt

Don Chambers 9/25/2017 11:07 AM  
**Moved (insertion) [1]**

Don Chambers 9/25/2017 11:07 AM  
**Deleted:** One can calculate both components of the velocity at crossover points, where the ascending and descending groundtracks cross, under the

Don Chambers 9/25/2017 11:12 AM  
**Deleted:** ption

Don Chambers 10/11/2017 1:29 PM  
**Deleted:** of the groundtracks

Don Chambers 9/25/2017 11:09 AM  
**Deleted:** (Parke et al., 1987).

Don Chambers 10/11/2017 1:29 PM  
**Formatted:** Font:Not Italic



303 by 8 km at most over this period. At higher latitudes, this is even less. Considering the diameter  
 304 of eddies at these latitudes are of order 100 km [Chelton et al., 2007], the movement is not large  
 305 enough to cause a significant change in velocity at the point. The primary problem with  
 306 velocities computed from crossovers is the smaller number compared to using gridded data, or  
 307 the time-varying, anomalous geostrophic current normal to the groundtrack ( $u_T$ ). This can be  
 308 computed directly from the derivative of the SSH anomaly ( $\eta$ ) along the ground-track distance  
 309 ( $dr$ ) from

$$u_T = -\frac{g}{f} \frac{d\eta}{dr} \quad (3)$$

311 This cross-track current is a projection of both the zonal ( $u$ ) and meridional ( $v$ ) components of  
 312 the full anomalous velocity field. However, neither  $u$  nor  $v$  can be determined unambiguously  
 313 from  $u_T$ . Here, we merely examine the variability of  $u_T$  without making any assumptions  
 314 concerning how it may be related to the full velocity, or  $u$  and  $v$ .

315 Because derivatives of SSHA (Equations 1 and 3) have to be computed numerically (here,  
 316 center-differences are used) and  $\eta$  contains significant noise at the 1 Hz sampling-rate of the  
 317 altimeters, we optimally interpolate  $\eta$  along-track using a model of the covariance of the signal  
 318 and error. We used the method of Wunsch (2006, Chapter 3) and a covariance function modeled  
 319 as a Gaussian with a roll-off of 98 km and random noise of 2 cm, which was determined from the  
 320 autocovariance of all TOPEX/Poseidon, Jason-1, and Jason-2 SSHA data from 1993-2015  
 321 between 40°S and 65°S.

322 Once  $u_T(t)$  was computed at each 1-sec bin along the groundtracks in Figure 2 for each 10-  
 323 day repeat cycle, the cross-track kinetic energy (CKE) was computed as  $CKE(x,t) = 0.5 u_T(x,t)^2$ ,

Don Chambers 10/11/2017 1:29 PM  
 Formatted: Font:Not Italic

Don Chambers 9/25/2017 11:09 AM  
 Deleted: At high latitudes of the Southern Ocean, the time separation between ascending and descending passes is less than 3 days for 78% of the crossovers, so this is a reasonable assumption. - ... [3]

Unknown  
 Formatted: Lowered by 15 pt

Don Chambers 10/11/2017 1:30 PM  
 Deleted: ), which

Unknown  
 Formatted: Lowered by 15 pt

Don Chambers 9/25/2017 11:15 AM  
 Deleted: ,

Don Chambers 9/25/2017 11:15 AM  
 Deleted: I

Don Chambers 9/25/2017 11:15 AM  
 Deleted: where  $g$  is the acceleration due to gravity, and  $f$  is the Coriolis parameter.

Don Chambers 9/25/2017 11:16 AM  
 Deleted: without significant simplifying assumptions.

Don Chambers 9/22/2017 3:07 PM  
 Deleted: chose to

338 where  $x$  here is used to denote a generic 1-sec bin along the ground track. We also computed the  
339 full EKE at the more limited crossover points as  $EKE(x,t) = 0.5(u(x,t)^2 + v(x,t)^2)$ .

340 The CKE values were averaged over the entire 24-year record and examined for each  
341 groundtrack segment (both ascending and descending) to judge where CKE was exceptionally  
342 high (Figure 3). We also computed CKE using the raw values of  $\eta$  with no optimal interpolation  
343 and compared to that computed with optimal interpolation. The locations of high CKE were the  
344 same, although values were significantly higher with the unsmoothed data. The quiescent regions  
345 of the ocean also showed considerably more noise, making it more difficult to determine  
346 boundaries of elevated CKE. For this reason, the values determined from the optimally  
347 interpolated data were used.

348 Several criteria were utilized to quantify where the high CKE values were considered to be  
349 associated with fronts. First, we constrained the southern boundary to be 5° south of the Orsi et  
350 al. (1995) values of the PF and the northern boundary to be 5° north of the SAF. Secondly, we  
351 used a lower-limit for CKE of  $200 \text{ cm}^2 \text{ s}^{-2}$  for detection and tested that the width of the envelope  
352 of high CKE above the lower-limit was at least 100 km. The requirement that the envelope be  
353 greater than 100 km was done to reduce the impact of eddies in an otherwise quiescent region,  
354 since the diameter of eddies in the Southern Ocean is about 100 km. The CKE lower-limit was  
355 determined via iteration with different limits. For each case, the average center of the CKE  
356 envelope averaged over 24-years (based on the mean of the first and last points to exceed the  
357 lower-limit) was computed and compared visually to the Orsi et al. (1995) front positions.  $200$   
358  $\text{cm}^2 \text{ s}^{-2}$  was selected because there were a significant amount of CKE envelope centers clustered  
359 around the Orsi et al. (1995) fronts and the envelopes were found for every 10-day repeat cycle.  
360 Using a higher limit resulted in fewer detections, especially when smaller time-averages were

Don Chambers 9/25/2017 11:25 AM

Formatted: Font:Not Italic

Don Chambers 9/25/2017 11:25 AM

Formatted: Font:Not Italic

Don Chambers 9/25/2017 11:25 AM

Deleted: se

Don Chambers 9/22/2017 3:07 PM

Deleted: 3

Don Chambers 9/22/2017 3:07 PM

Deleted: (Figure 3).

Don Chambers 9/22/2017 3:08 PM

Deleted: slightly

Don Chambers 9/25/2017 11:40 AM

Deleted: or jets

Don Chambers 10/11/2017 1:32 PM

Deleted: exceeded

Don Chambers 10/11/2017 1:33 PM

Deleted: for at

368 used. Using a lower limit, we could find more potential front positions based on CKE, but many  
369 were far from the front positions estimated by Orsi et al (1995).

370 An example of a detected high CKE envelope is shown in Figure 3, based on the average of  
371 CKE between 1993 and 2015 computed from T/P-Jason satellite pass 207 in the south Indian  
372 Ocean. This pass starts at 64.3°S near the prime meridian and extends to 41.2°S and 41°E  
373 longitude. There is clearly a wide envelope of enhanced CKE greater than  $200 \text{ cm}^2 \text{ s}^{-2}$  between  
374 55°S and 47°S.

375 The mean CKE profile pictured in Figure 3 has multiple local maxima, most likely associated  
376 with variability of the narrow jets that surround the front. As shown by Chapman (2017a), these  
377 jets (evidenced in higher gradients of SSHA) do not occur around a front 100% of the time. At  
378 most, they occur about 30% of the time, and more often less than 15% of the time. Figure 4  
379 shows the behavior of CKE along this pass for different 3-year periods. Note that the number of  
380 clearly defined maxima ranges from a low of 4 for the 2014-2016 average to 9 in 1993-1995.  
381 While other studies have estimated positions of these maxima in SSHA gradients on daily  
382 intervals (e.g., Chapman, 2017a), one does not obtain a consistent number of maxima each time,  
383 making the determination of shifts difficult. Moreover, note that although there are two general  
384 peaks in CKE in the long-term mean profile, the minimum between them is still higher than  $200$   
385  $\text{cm}^2 \text{ s}^{-2}$ . A minimum is also not well defined in several of the shorter averaging periods (for  
386 example, 2008-2010).

387 Thus, instead of attempting to track all the maxima of CKE individually – analogous to  
388 tracking steepest gradients, as in Thompson et al. (2010), Graham et al. (2012), or Chapman  
389 (2017a) – we track an estimate of the center of the envelope of enhanced CKE, as it exists in all  
390 averaging periods. The assumption we make in doing this is that the localized maxima are

- Don Chambers 9/25/2017 11:39 AM  
**Deleted:** ; only values higher than this were considered high and likely associated with a front. For the example
- Don Chambers 9/25/2017 12:02 PM  
**Deleted:** (from
- Don Chambers 9/25/2017 11:58 AM  
**Deleted:** a track
- Don Chambers 10/12/2017 9:18 AM  
**Deleted:** , starting
- Don Chambers 10/12/2017 9:17 AM  
**Deleted:** going
- Don Chambers 10/12/2017 9:17 AM  
**Deleted:** between 1993 and 2015
- Don Chambers 9/25/2017 12:02 PM  
**Deleted:** )
- Don Chambers 9/25/2017 12:03 PM  
**Deleted:** ,
- Don Chambers 9/25/2017 12:05 PM  
**Deleted:** there is a region of
- Don Chambers 9/25/2017 12:06 PM  
**Deleted:** The value of  $200 \text{ cm}^2 \text{ s}^{-2}$  was chosen over a lower value because it was found that the regions selected with the  $200 \text{ cm}^2 \text{ s}^{-2}$  were consistent from one 10-day period to another. Using lower minimum values resulted in areas of high CKE activity being detected in some cycles, but not others. An example is the small rise in mean CKE at 41°S in Figure 3. Although the mean CKE is about  $150 \text{ cm}^2 \text{ s}^{-2}$ , suggestive of a jet, this all but disappears for some periods of time. This behavior of jets has been observed in models (e.g., Thompson and Richards, 2011). Thus, the minimum CKE was selected to be as conservative as possible.
- Don Chambers 10/12/2017 9:18 AM  
**Deleted:** the
- Don Chambers 10/12/2017 9:18 AM  
**Deleted:** in
- Don Chambers 10/12/2017 9:19 AM  
**Deleted:** as short as

420 associated with variable jets, but the position of the envelope of high CKE is related to the front.

421 There are many different ways to compute a “center” of the envelope, ranging from the  
422 average of the two end points, to a centroid calculation, to computing the point where the integral  
423 of CKE over distance is balanced on both sides, which we call the “half-power point.” We have  
424 selected the latter to use, as it defines a “center” closer to the peak of CKE in the envelope. This  
425 is advantageous when the CKE curve is slightly skewed, with less magnitude on one side and  
426 more on the other. Assuming that the variability (and hence CKE) would be highest near the  
427 front (i.e., what is assumed in studies using the gradient method), finding a center of the  
428 envelope that is biased toward peak CKE is a reasonable approach.

429 The half-power point ( $x_{mid}$ ) is computed so that

430 
$$\int_{x_{south}}^{x_{mid}} CKE(x) dx = \frac{1}{2} \int_{x_{south}}^{x_{north}} CKE(x) dx \quad (4)$$

431 where  $x_{south}$  and  $x_{north}$  are computed by first finding the maximum of CKE in the envelope above  
432  $200 \text{ cm}^2 \text{ s}^{-2}$ , then finding the first value to the north just below 25% of that peak along with the  
433 similar value to the south (shown in Figure 3). Values other than 25% of the peak were tested.  
434 Using value greater than this, up to 50%, resulted in no significant difference in the half-power  
435 point. Using values smaller resulted in some boundaries not being defined. Thus, 25% of peak  
436 CKE was considered reasonable. If multiple regions of enhanced CKE were found along the  
437 same track, this process was carried out for each of them. This was done for all the 24-year mean  
438 CKE profiles to establish the mean locations of the fronts between 1993 and 2016.

439 A similar procedure was done for CKE averaged over discrete 3-year intervals, starting in  
440 January 1993 and ending in December 2016. A 3-year average was used to reduce the influence

Don Chambers 9/25/2017 1:20 PM  
**Deleted:** Most of the other profiles examined had similar features. We initially tried tracking each of the maxima, but that quickly became complicated because sometimes the four or local maxima would become five, or even just one. This is likely due to the instability of the jets around the front. In order to ensure consistency and assuming the mean of the region of high CKE followed the front position, the half-power point, or centroid, of the CKE bump was computed. This is similar in principle to the computation made by Gille (2014) of the latitude of the mean ACC transport, except here we are focused on mean of the CKE around a particular front, not over all the fronts of the ACC. ... [4]

Don Chambers 9/25/2017 1:41 PM  
**Formatted:** Font:Italic

Don Chambers 9/26/2017 10:37 AM  
**Deleted:** .

Don Chambers 9/25/2017 1:41 PM  
**Formatted:** Font:Italic, Subscript

Unknown  
**Field Code Changed**

Don Chambers 10/12/2017 9:21 AM  
**Deleted:** .

Don Chambers 9/25/2017 1:42 PM  
**Deleted:** a southern and northern boundary of the CKE bump had to be determined. These were

Don Chambers 9/25/2017 1:42 PM  
**Deleted:** bump

Don Chambers 9/25/2017 1:41 PM  
**Formatted:** Not Superscript/ Subscript

Don Chambers 9/25/2017 1:42 PM  
**Formatted:** Superscript

Don Chambers 9/25/2017 1:42 PM  
**Formatted:** Superscript

Don Chambers 9/25/2017 1:43 PM  
**Deleted:** . These were selected as the north ( $x_{north}$ ) and south ( $x_{south}$ ) boundaries for the calculation of the half-power point ( $x_{mid}$ ) so that .

Don Chambers 9/25/2017 1:43 PM  
**Deleted:** .

Don Chambers 10/12/2017 9:22 AM  
**Deleted:** 2015

Don Chambers 9/26/2017 10:37 AM  
**Deleted:** .

472 of individual eddies on determining the envelope, and to reduce interannual variations in the  
 473 front position, which have been observed in other studies at some locations (e.g., Kim and Orsi,  
 474 2014; Shao et al., 2015). In particular, Kim and Orsi (2014) and Shao et al. (2015) found  
 475 significant correlation with the Southern Annular Mode, which has a quasi-biennial oscillation  
 476 (Hibbert et al., 2010). By averaging over three years, we found 8 distinct, statistically  
 477 uncorrelated samples of CKE for each groundtrack from which to deduce shifts in the half-power  
 478 point.

### 479 3. RESULTS AND ANALYSIS

480 The first thing tested was how well CKE represented the full EKE. If CKE does not have the  
 481 same general shape as EKE, then using it as a proxy for EKE to determine high energy envelopes  
 482 is not valid. After finding satellite passes with high CKE as discussed in Section 2, EKE was  
 483 computed along the same pass, using the crossover method (Equations 1 and 2).

484 Although CKE is lower than EKE along all groundtracks (see Figure 5 for examples), the  
 485 pattern of KE rise then fall is virtually identical. CKE, however, has the benefit of higher and  
 486 more regular sampling. Thus, we conclude CKE is a reasonable proxy for locating front positions  
 487 even though it may not be useful for quantifying the full energy of the anomalous currents.

488 Four general types of enhanced CKE were found (Figures 4 and 5). In most regions, the  
 489 envelope in CKE is more or less symmetrical (52% of cases). Only a few profiles have two  
 490 distinct regions of enhanced CKE that were identified, with a clearly defined minimum below  
 491  $200 \text{ cm}^2 \text{ s}^{-2}$  between them in all time periods (3% of cases). 20% of the passes have multiple  
 492 peaks that vary in time but have no consistent minimum between the peaks (i.e., Figure 4), while  
 493 25% have a skewed envelope (Figure 5), with a long rise in CKE followed by a sharp drop-off.

494 In all cases, though, the shape of the CKE envelope closely follows that of EKE, although the

Don Chambers 9/26/2017 10:54 AM  
**Deleted:** This provided

Don Chambers 9/26/2017 2:11 PM  
**Deleted:** -

Don Chambers 9/26/2017 11:07 AM  
**Formatted:** Font:Times, Font color: Auto

Don Chambers 9/26/2017 11:09 AM  
**Formatted:** Normal, Space After: 0 pt, Tabs:Not at 3.25" + 6.5"

Don Chambers 9/26/2017 11:09 AM  
**Deleted:** , where  $EKE = 0.5(u^2 + v^2)$ . One can calculate both components of the velocity at crossover points, where the ascending and descending groundtracks cross, under the assumption that the velocity field has not changed significantly between the times of the groundtracks (Parke et al., 1987). At high latitudes of the Southern Ocean, the time separation between ascending and descending passes is less than 3 days for 78% of the crossovers, so this is a reasonable assun ... [5]

Don Chambers 9/25/2017 11:07 AM  
**Moved up [1]:** One can calculate both components of the velocity at crossover points, where the ascending and descending ... [6]

Unknown  
**Formatted:** Lowered by 15 pt

Unknown  
**Formatted:** Lowered by 15 pt

Don Chambers 9/26/2017 11:14 AM  
**Deleted:** 4

Don Chambers 9/26/2017 11:15 AM  
**Deleted:** Three

Don Chambers 9/26/2017 11:15 AM  
**Deleted:** 4

Don Chambers 9/26/2017 11:15 AM  
**Deleted:** "bump"

Don Chambers 9/26/2017 11:17 AM  
**Formatted:** Superscript

Don Chambers 9/26/2017 11:17 AM  
**Formatted:** Superscript

Don Chambers 9/26/2017 11:19 AM  
**Deleted:** In several, however, the bun ... [7]

Don Chambers 10/12/2017 9:26 AM  
**Deleted:** a long rise

Don Chambers 9/26/2017 11:19 AM  
**Deleted:** then

Don Chambers 9/26/2017 11:19 AM  
**Deleted:** Finally, there were also a few ... [8]

Don Chambers 9/26/2017 11:20 AM  
**Deleted:** followed

538 amplitude was attenuated, by anywhere from 25-50%. Having closer samples of CKE, however,  
539 allows for a better computation of the half-power point and possible shifts.

540 Figure 6 shows the locations of the half-power points determined from the mean CKE  
541 profiles, along with estimate of the front position based on different methods: density gradients  
542 from historical hydrographic sections (Orsi et al., 1995), dynamic topography contours (Kim and  
543 Orsi, 2014), and the gradient of sea surface temperature (Freeman and Lovenduski, 2016a).  
544 There are two estimates of the SAF and SACCF, and three of the PF. One of the PF estimates  
545 (from Freeman and Lovenduski, 2016a) includes the standard deviation of the daily estimates.

546 It is important to note the large differences in estimates for the same front, which indicates  
547 how uncertain these calculations are. For instance, in the Indian Ocean at 50°E, Freeman and  
548 Lovenduski (2016a) find the PF at the same location that Orsi et al. (1995) found the SAF, while  
549 Kim and Orsi (2014) find it significantly farther south. The SAF determination using the contour  
550 method (Kim and Orsi, 2014) is substantially farther north than the one determined from  
551 hydrographic data (Orsi et al., 1995) at most longitudes.

552 Many estimates from the half-power points of enhanced CKE occur between the same front  
553 estimated by different methods, indicating they are at least within the uncertainty bounds of  
554 frontal detection by other methods. Other values are at locations either north or south of the other  
555 front estimates by as much as 3°, but it should be noted that the standard deviation of the PF  
556 estimated by Freeman and Lovenduski (2016a,b) averages 2-3°, indicating these positions  
557 estimated from CKE are well within the level of expected frontal variability.

558 Probably a better method for determining frontal position is to examine the probability of jets  
559 occurring (Chapman, 2017a) (Figure 7). The CKE-defined mean front positions lie within the  
560 probability envelopes, giving more confidence that the CKE measure is providing a comparable

Don Chambers 9/26/2017 2:11 PM

Deleted: -

Don Chambers 9/26/2017 1:43 PM

Deleted: 2

Don Chambers 10/12/2017 9:27 AM

Deleted: the

Don Chambers 10/12/2017 9:28 AM

Deleted: any

565 [measure of frontal position in many areas. The only location where CKE-defined fronts don't](#)  
566 [agree well with the probability field from Chapman \(2017a\) is just west of the dateline, where](#)  
567 [two points lie between levels of high jet \(and hence front\) probability.](#)

568 [Still, the good comparison is reassuring that the method developed in Section 2 is](#)  
569 [successfully detecting regions of high energy related to jets around fronts. Since the movement](#)  
570 [of jet positions has been used to estimate movement of the fronts \(e.g., Chapman, 2017a\), a](#)  
571 [comparable calculation with positions of high CKE seems reasonable.](#)

572 [To quantify movement of the envelope of enhanced CKE, a linear trend is fit to the 8](#)  
573 [estimations of the half-power point from 1993-2016 for each location shown in Figures 5 and 6.](#)  
574 [Analysis of the residuals about the trend indicated they were random \(lag-1 autocorrelation < 0.1](#)  
575 [for all cases\), so standard error was computed by scaling the formal error from the covariance](#)  
576 [matrix determined in ordinary least squares by the standard deviation of the residuals. This was](#)  
577 [also scaled up to account for the degrees of freedom lost by estimating the trend by  \$\sqrt{n/n\_{EDOF}}\$ ,](#)  
578 [where  \$n = 8\$ , and  \$n\_{EDOF} = 6\$ . Finally, the 90% confidence interval was computed by scaling by](#)  
579 [1.94 for 6 effective degrees of freedom assuming a normal t-distribution of the residuals.](#)

580 [The results indicate considerable regional variability in the change of the half-power point](#)  
581 [over 24 years, with large uncertainty bars \(Figure 8\). This is due to the substantial temporal](#)  
582 [variability in the positions, which can be seen in Figure 4, where the leading edge of the CKE](#)  
583 [envelope varies by over 1 degree of latitude \(over 100 km\) between 1993-1995 and 2011-2012.](#)  
584 [To better see significant changes outside the uncertainty \(90% confidence\) interval, one can](#)  
585 [compute the signal to noise ratio \(SNR = trend/uncertainty\). Examining this \(Figure 9\), one can](#)  
586 [see there are some regions where the half-power point has moved southward by a significant](#)  
587 [distance over the last 24 years \(13.6% of points\), but there are also points where it has moved](#)

Don Chambers 9/26/2017 2:09 PM  
**Deleted:** Although a potential front position is not found along every groundtrack, they are typically found in areas where currents are strong and close to perpendicular with the ascending or descending groundtracks. It is also clear that there are more sites found along the SAF than the PF. A few are found between the two fronts, but this is likely due to either errors in the older front database of Orsi et al. (1995), changes since the hydrographic data used in that study were collected, or jets between the fronts. One location is found substantially south of the Polar Front, and is likely related to the weaker Southern ACC front. ... [9]

Don Chambers 9/26/2017 2:11 PM  
**Deleted:** potential

Don Chambers 9/26/2017 2:12 PM  
**Deleted:** 2015

Don Chambers 9/26/2017 2:12 PM  
**Deleted:** 2

Don Chambers 9/26/2017 2:13 PM  
**Deleted:** (making the effective degrees of freedom 6) by scaling

Don Chambers 9/26/2017 2:12 PM  
**Deleted:** 8

Don Chambers 9/26/2017 2:12 PM  
**Deleted:** 6

Don Chambers 9/26/2017 2:12 PM  
**Formatted:** Font:Italic

Don Chambers 9/26/2017 2:12 PM  
**Formatted:** Font:Italic

Don Chambers 9/26/2017 2:12 PM  
**Formatted:** Font:Italic, Subscript

Don Chambers 9/26/2017 2:13 PM  
**Formatted:** Font:Italic

Don Chambers 9/26/2017 2:17 PM  
**Deleted:** 3

Don Chambers 9/26/2017 2:14 PM  
**Deleted:** 6

Don Chambers 10/3/2017 3:05 PM  
**Deleted:** somewhat

Don Chambers 9/26/2017 2:14 PM  
**Deleted:** 5

Don Chambers 9/26/2017 2:17 PM  
**Deleted:** bump

Don Chambers 9/26/2017 2:18 PM  
**Deleted:** 7

Don Chambers 10/12/2017 9:31 AM  
**Deleted:** 23

618 north (9.6%). For the majority of points (76.8%), there is no statistically significant change,  
619 meaning no movement of the front is as likely as either a southward or northward shift due to the  
620 high variability in 3-year positions.

Don Chambers 10/12/2017 9:31 AM  
Deleted: -

#### 622 4. DISCUSSION AND CONCLUSIONS

623 The results from the analysis of the positions of enhanced kinetic energy suggest no overall  
624 shift in the frontal positions across the Southern Ocean, but some large, localized movements.

625 The region indicative of some southward shift between 90°E and 170°E is in approximately the  
626 same area where Kim and Orsi (2014) and Freeman and Lovenduski (2016a) also reported large  
627 shifts, between 1992 to 2011 and 2002 and 2014, respectively. However, Freeman and

Don Chambers 10/12/2017 9:32 AM  
Deleted: s

Don Chambers 10/3/2017 12:04 PM  
Deleted: Freeman et al.

Don Chambers 10/3/2017 12:04 PM  
Deleted: Freeman et al.

628 Lovenduski only examined the Polar front, and Kim and Orsi (2014) only found large shifts in  
629 the PF and the southern ACC front. They found shifts of order 50-100 km in the SAF where the  
630 points in this study cluster, which is considerably smaller than the individual shifts we find

Don Chambers 10/12/2017 9:33 AM  
Deleted: .

Don Chambers 10/10/2017 3:39 PM  
Deleted: . Our results suggest considerably larger

Don Chambers 10/10/2017 3:39 PM  
Deleted: in some areas

Don Chambers 10/10/2017 3:39 PM  
Deleted: , although the

631 between 90°E and 170°E along the SAF. However, the overall average over the region between  
632 90°E and 170°E (-29 km per decade, or -66.7 km in 23 years), is consistent with what Kim and  
633 Orsi (2014) found.

634 Kim and Orsi (2014) and Freeman and Lovenduski (2016a) also found slight northward  
635 shifts in the front positions in the southeast Pacific, between 200°E-270°E. We also find some  
636 locations in this region with a significant northward shift in the SAF. Kim and Orsi (2014) found  
637 the shift of the SAF was about 30-40 km between 1992 and 2011. Our results suggest larger  
638 shifts in some areas; averaged over the area, our results are 46 km per decade to the north, or 106

Don Chambers 10/3/2017 12:04 PM  
Deleted: Freeman et al.



649 km from 1993-2015, which is consistent with the average over the region computed by [Freeman](#)  
650 [and Lovenduski \(2016a\)](#) from sea surface temperature data, but for the Polar Front.

651 [Kim and Orsi \(2014\)](#) suggest that the shift of the fronts in the Indian Ocean were not directly  
652 related to shifts in winds, but instead were caused by an expansion of the Indian subtropical gyre.  
653 They linked the shift in the southeastern Pacific to wind changes related to mainly the Southern  
654 Annular Mode in that region (Kim and Orsi, 2014).

655 Overall, this study supports the recent studies by Kim and Orsi (2014), Gille (2014), [Freeman](#)  
656 [and Lovenduski \(2016a\)](#), [and Chapman \(2017a\)](#). All find that, while the frontal positions of the  
657 ACC are highly variable in time, there is no statistically significant shift in the fronts to the south  
658 on average. This study utilized a novel technique to reach this conclusion, which adds to the  
659 robustness of evidence that there has not been a shift in the frontal positions. Thus, while the  
660 fronts may eventually shift south in a warming climate, there is no strong evidence that it is  
661 happening at the moment.

662 Other studies have shown significant positive trends in the Southern Ocean that have been  
663 connected to the warming climate. These include changes in the ocean heat content in the upper  
664 ocean between the 1930s-1950s and 1990s (e.g., Böning et al., 2008; Gille, 2008), increases in  
665 the heat content of deep water between the 1990s and 2005 (e.g., Purkey and Johnson, 2010),  
666 and increases in eddy kinetic energy in the Indian and Pacific Oceans since 1993 (Hogg et al.,  
667 2015). Observational evidence of shifts in the winds, however, indicates that while there may be  
668 a slight southward shift in winds during the southern hemisphere summer, the overall yearly  
669 average shift is not significant (Swart and Fyfe, 2012). Thus, the growing consensus that fronts  
670 have not shifted to the south, on average, is consistent with observations of no significant shift in  
671 the yearly averaged winds.

Don Chambers 10/3/2017 12:04 PM  
Deleted: Freeman et al.

Don Chambers 10/10/2017 4:28 PM  
Deleted:

Don Chambers 10/10/2017 4:19 PM  
Deleted: and

Don Chambers 10/3/2017 12:04 PM  
Deleted: Freeman et al.

Don Chambers 10/10/2017 4:19 PM  
Deleted: that

Don Chambers 10/10/2017 3:44 PM  
Deleted: and that

Don Chambers 10/10/2017 3:50 PM  
Moved (insertion) [3]

Don Chambers 10/10/2017 3:50 PM  
Deleted: -

Don Chambers 10/10/2017 3:50 PM  
Moved up [3]: This study utilized a novel technique to reach this conclusion, which adds to the robustness of evidence that there has not been a shift in the frontal positions. Thus, while the fronts may eventually shift south in a warming climate, there is no strong evidence that it is happening at the moment.

686 | The only evidence supporting a hypothesis that ACC fronts have shifted southward since the  
687 | 1990s comes from mapping the location of contours of constant dynamic topography over time  
688 | (e.g., Sokolov and Rintoul, 2009b; Kim and Orsi, 2014). As Gille (2014) argued and as we have  
689 | demonstrated based on a simple thought experiment (Figure 1), there are other equally plausible  
690 | explanations for the apparent southern shift of the contours. Considering that four different  
691 | techniques – location of mean transport (Gille, 2014), maximum SST gradients (Freeman and  
692 | Lovenduski, 2016a), probability of jet positions (Chapman, 2017a), and the location of enhanced  
693 | kinetic energy (this study) – all agree that the fronts have not moved significantly on average,  
694 | one has to conclude that the method of using dynamic topography contours to detect changes in  
695 | front position is too sensitive to sea level rise be useful for determining shifts in frontal positions,  
696 | although it may prove useful for determining the mean position as Chapman (2017a) has argued.  
697 |

Don Chambers 10/10/2017 4:15 PM  
**Deleted:** The only  
Don Chambers 10/10/2017 4:15 PM  
**Deleted:** this

Don Chambers 10/10/2017 4:15 PM  
**Deleted:** three

Don Chambers 10/3/2017 12:04 PM  
**Deleted:** Freeman et al.

Don Chambers 10/4/2017 4:02 PM  
**Deleted:** flawed

Don Chambers 10/4/2017 4:02 PM  
**Deleted:** As Gille (2014) concluded, the most likely explanation for the signal is the observed rise in sea level over the region due to warming of water in the region.

707

708 **Acknowledgements**

709 [The author would like to thank Christopher Chapman and an anonymous reviewer for their](#)  
 710 [extensive comments on an earlier draft of this paper. Their many suggestions helped the author](#)  
 711 [improve the paper substantially.](#) This research was carried out under grant number  
 712 NNX13AG98G from NASA and [a grant](#) from NOAA for the NASA/NOAA Ocean Surface  
 713 Topography Science Team.

Don Chambers 10/12/2017 9:36 AM  
 Deleted: significantly

Don Chambers 10/4/2017 3:59 PM  
 Deleted: Grant number

Don Chambers 10/4/2017 3:59 PM  
 Deleted: \*\*\*

714 **REFERENCES**

715 Andersen O B, and Knudsen P: DNSCO8 mean sea surface and mean dynamic topography  
 716 models, *J. Geophys. Res.*, 114, C11001, doi:10.1029/2008JC005179, 2009.

717 Beckley, B.D., Zelensky, N.P., Holmes, S.A., Lemoine, F.G., Ray, R.D., Mitchum, G.T., Desai,  
 718 S., and Brown, S. T.: Assessment of the Jason-2 Extension to the TOPEX/Poseidon, Jason-1  
 719 Sea-Surface Height Time Series for Global Mean Sea Level Monitoring, *Marine Geodesy*,  
 720 33(S1): 447-471, Supplemental Issue on OSTM/Jason-2 calibration/validation, Vol. 1, DOI:  
 721 10.1080/01490419.2010.491029, 2010

722 Belkin, I. M., and Gordon, A. L.: Southern Ocean fronts from the Greenwich meridian to  
 723 Tasmania, *J. Geophys. Res.*, 101, 3675–3696, 1996.

724 [Böning C. W., Dispert A., Visbeck M., Rintoul S. R., Schwarzkopf F. U.: The response of the](#)  
 725 [Antarctic circumpolar current to recent climate change. \*Nat Geosci.\*, 1, 864–869, 2008.](#)

726 Chapman, C. C.: Southern Ocean jets and how to find them: Improving and comparing common  
 727 jet detection methods, *J. Geophys. Res. Oceans*, 119, 4318–4339,  
 728 doi:10.1002/2014JC009810, 2014.

729 [Chapman, C. C., New perspectives on frontal variability in the Southern Ocean, \*J. Phys. Ocean.\*,](#)  
 730 [47, 1151-1168, doi:/10.1175/JPO-D-16-0222.1, 2017a.](#)

731 [Chapman, C. C., Data from: New perspectives on frontal variability in the southern ocean. Dryad](#)  
 732 [Digital Repository. <http://dx.doi.org/10.5061/dryad.q9k8r>, 2017b.](#)

733 [Chelton, D. B., M. G. Schlax, R. M. Samelson, and R. A. de Szoeke: Global observations of](#)  
 734 [large oceanic eddies, \*Geophys. Res. Lett.\*, 34, L15606, doi:10.1029/2007GL030812, 2007.](#)

735 Cunningham, S. A., Alderson, S. G. , King, B. A., and Brandon, M. A.: Transport and variability  
 736 of the Antarctic Circumpolar Current in Drake Passage, *J. Geophys. Res.*, 108(C5), 8084,  
 737 doi:10.1029/2001JC001147, 2003

738 Dong, S., Sprintall, J., and Gille, S. T. : Location of the Antarctic Polar Front from AMSR-E  
 739 Satellite Sea Surface Temperature measurements, *J. Phys. Oceanogr.*, 36, 2075–2089,  
 740 doi:10.1175/JPO2973.1, 2006.

741 Ducet, N., Le Traon, P.-Y., Reverdin, G.: Global high resolution mapping of ocean circulation  
 742 from TOPEX/Poseidon and ERS-1 and -2. *Journal of Geophysical Research* 105 (C8),

746 19477–19498, 2000.

747 Fyfe, J. C., and Saenko, O. A.: Simulated changes in the extratropical Southern Hemisphere

748 winds and currents, *Geophys. Res. Lett.*, 33, L06701, doi:10.1029/2005GL025332, 2006.

749 [Freeman, N. M., Lovenduski, N. S.: Mapping the Antarctic polar front: weekly realizations from](#)

750 [2002 to 2014, \*Earth System Science Data\*, 8, 191-198, doi:10.5194/essd-8-191-2016, 2016a.](#)

751 [Freeman, N. M., Lovenduski, N. S.: Mapping the Antarctic polar front: weekly realizations from](#)

752 [2002 to 2014, links to NetCDF file and MPEG4 movie, \*PANGEA\*,](#)

753 [doi:10.5194/PANGEA.855640, 2016b.](#)

754 [Gille, S.: Decadal-scale temperature trends in the Southern Hemisphere Ocean, \*J Climate\*, 21,](#)

755 [4749–4765, 2008](#)

756 Gille, S. T.: Meridional displacement of the Antarctic Circumpolar Current, *Philos. Trans. R.*

757 *Soc. A*, 372, 20130273, doi:10.1098/rsta.2013.0273, 2014.

758 Graham, R. M., De Boer, A. M., Heywood, K. J., Chapman, M. R., and Stevens, D. P.: Southern

759 Ocean fronts: Controlled by wind or topography?, *J. Geophys. Res. Oceans*, 117, C08018,

760 doi:10.1029/2012JC007887, 2012.

761 [Hibbert A, Leach H, Woodworth P, Hughes C, Roussenov V.: Quasi-biennial modulation of the](#)

762 [Southern Ocean coherent mode, \*Q. J. R. Meteorol. Soc.\*, 136, 755 – 768.](#)

763 [DOI:10.1002/qj.581, 2010.](#)

764 Hogg, A. McC., Meredith, M. P., Chambers, D. P., Abrahamsen, E. P., Hughes, C. W., and

765 Morrison, A. K.: Recent trends in the Southern Ocean eddy field, *J. Geophys. Res. Oceans*,

766 120, 257–267, doi:10.1002/2014JC010470, 2015.

767 Kim, Y. S., and Orsi, A. H.: On the variability of Antarctic Circumpolar Current fronts inferred

768 from 1992–2011 altimetry, *J. Phys. Oceanogr.*, 44, 3054–3071, doi:10.1175/JPO-D-13-

769 0217.1, 2014.

770 Langlais, C., Rintoul, S. R., and Schiller, A.: Variability and mesoscale activity of the Southern

771 Ocean fronts: Identification of a circumpolar coordinate system, *Ocean Modell.*, 39, 79–96,

772 doi:10.1016/j.ocemod.2011.04.010, 2011.

773 Moore, J. K., Abbott, M. R., and Richman, J. G.: Location and dynamics of the Antarctic Polar

774 Front from satellite sea surface temperature data, *J. Geophys. Res.*, 104, 3059–3073,

775 doi:10.1029/1998JC900032, 1999.

776 Nowlin, W. D., and Clifford, M.: The kinematic and thermohaline zonation of the Antarctic

777 Circumpolar current at Drake Passage, *J. Mar. res.*, 40, 481-507, 1995.

778 Orsi, A. H., Whitworth III, T., and Nowlin Jr., W. D.: On the meridional extent and fronts of the

779 Antarctic Circumpolar Current, *Deep Sea Res., Part I*, 42(5), 641–673, doi:10.1016/0967-

780 0637(95)00021-W, 1995.

781 Parke, M. E., Stewart, R. H., Farless, D. L., and Cartwright, D. E.: On the choice of orbits for an

782 altimetric satellite to study ocean circulation and tides, *J. Geophys. Res.*, 92, 11693–11707,

783 1987.

784 [Pujol, M.-I., Faugere, Y., Taburet, G., Dupuy, S., Pelloquin, C., Ablain, M., Picot, N., DUACS](#)

785 [DT2014: the new multi-mission altimeter data set reprocessed over 20 years, \*Ocean. Sci.\*, 12,](#)

786 [1067-1090, doi:10.5194/os-12-1067-2016, 2016.](#)

787 [Purkey, S. G., and Johnson, G. C.: Warming of global Abyssal and deep southern ocean waters](#)

788 [between the 1990s and 2000s: Contributions to global heat and sea level rise budgets, \*J.\*](#)

789 [Clim., 23, 6336–6351, doi:10.1175/2010JCLI3682.1, 2010.](#)

790 Sallee, J. B., Speer, K., and Morrow, R.: Response of the Antarctic Circumpolar Current to

791 atmospheric variability, *J. Clim.*, 21(12), 3020–3039, doi:10.1175/2007JCLI1702.1, 2008.

Don Chambers 10/10/2017 4:10 PM  
Formatted: Font:Times, 12 pt

Don Chambers 10/10/2017 4:10 PM  
Formatted: Font:Times, 12 pt

Don Chambers 10/10/2017 4:10 PM  
Formatted: Widow/Orphan control, Adjust space between Latin and Asian text, Adjust space between Asian text and numbers, Font Alignment: Baseline

Don Chambers 10/10/2017 4:10 PM  
Formatted: Font:Times, 12 pt

Don Chambers 10/10/2017 4:10 PM  
Formatted: Font:Times, 12 pt, Not Bold

Don Chambers 10/10/2017 4:10 PM  
Formatted: Font:Times, 12 pt

792 | [Shao, A. E., S. T. Gille, S. Mecking, and L. Thompson: Properties of the Subantarctic Front and](#)  
793 | [Polar Front from the skewness of sea level anomaly, \*J. Geophys. Res. Oceans\*, 120,](#)  
794 | [5179–5193, doi:10.1002/2015JC010723, 2015.](#)  
795 | Sokolov, S., and Rintoul, S. R.: Multiple jets of the Antarctic Circumpolar Current south of  
796 | Australia, *J. Phys. Oceanogr.*, 37, 1394–1412, doi:10.1175/JPO3111.1, 2007.  
797 | Sokolov, S., and Rintoul, S. R.: Circumpolar structure and distribution of the Antarctic  
798 | Circumpolar Current fronts: 1. Mean circumpolar paths, *J. Geophys. Res.*, 114, C11018,  
799 | doi:10.1029/2008JC005108, 2009a.  
800 | Sokolov, S., and Rintoul, S. R.: Circumpolar structure and distribution of the Antarctic  
801 | Circumpolar Current fronts: 2. Variability and relationship to sea surface height, *J. Geophys.*  
802 | *Res.*, 14, C11019, doi:10.1029/2008JC005248, 2009b.  
803 | Swart, N., and Fyfe, J. C.: Observed and simulated changes in the Southern Hemisphere surface  
804 | westerly wind-stress. *Geophys. Res. Lett.*, 39, L16711, doi:10.1029/2012GL052810, 2012.  
805 | Thompson, A. F., Haynes, P. H., Wilson, C., and Richards, K. J.: Rapid Southern Ocean front  
806 | transitions in an eddy-resolving ocean GCM, *Geophys. Res. Lett.*, 37, L23602,  
807 | doi:10.1029/2010GL045386, 2010.  
808 | Thompson, A. F., and Richards, K. J.: Low frequency variability of Southern Ocean jets, *J.*  
809 | *Geophys. Res.*, 116, C09022, doi:10.1029/2010JC006749, 2011.  
810 | Wunsch, C.: *The Ocean Circulation Inverse Problem*, 458 pp., Cambridge Univ. Press, Cambridge, Mass.

811  
812  
813

814 **Figure Captions**

815  
816 **Figure 1.** a) Mean dynamic topography in the Southern Ocean along a north-south meridian for three  
817 scenarios, and b) the corresponding geostrophic velocity, with positive values indicating eastward flow.  
818 The scenarios are: an initial state (dashed black line), a shift of the two fronts south by 60 km with no  
819 change in magnitude or shape of the currents (red line), and no shift of the mean of the current, but a  
820 change in the magnitude and shape (blue line).

821  
822 **Figure 2.** Positions of the T/P, Jason-1, Jason-2 and Jason-3 groundtracks used for this study (black  
823 lines), and the approximate locations of the Subantarctic Front (red line) and the Polar Front (blue  
824 line) as estimated by Orsi et al. (1995). The orange track shows the location of the pass used in analysis  
825 shown in Figures 3 and 4. ▾

826  
827 **Figure 3.** An example profile of mean CKE (1993-2015) along a ground track in the southern Indian  
828 Ocean (shown in orange in Figure 2), demonstrating the location of the half-power point and the locations  
829 of the southern and northern boundaries of the enhanced CKE envelope. See text for details of the  
830 computations. ▾

831  
832 **Figure 4.** Three-year averages of CKE estimated along pass shown in Figure 2 (solid lines) along with  
833 the long-term mean from 1993-2016 (dotted line). ▾

834  
835 **Figure 5.** Examples of the three types of CKE profiles found (black lines), along with the value of the full  
836 EKE computed at crossover points. ▾

837  
838 **Figure 6.** Mean positions of fronts estimated from CKE (orange dots) along with estimates from other  
839 authors: Orsi et al. (1995) computed using hydrographic sections, Kim and Orsi (2014) based on contours  
840 of dynamic topography, and Freeman and Lovenduski (2016a) based on gradients of sea surface  
841 temperature. The Orsi et al. (1995) fronts were downloaded from  
842 [https://gcmd.nasa.gov/records/AADC\\_southern\\_ocean\\_fronts.html](https://gcmd.nasa.gov/records/AADC_southern_ocean_fronts.html). The Freeman and Lovenduski fronts  
843 were downloaded from <https://doi.pangaea.de/10.1594/PANGAEA.855640> (Freeman and Lovenduski,  
844 2016b). The Kim and Orsi (2014) fronts were provided by Yong Sun Kim upon request. ▾

845  
846 **Figure 7.** Mean positions of fronts estimated from CKE (black dots) along with the percent occurrence of  
847 a jet between 1993 and 2014 computed by Chapman (2017a). Data were downloaded from  
848 <http://dx.doi.org/10.5061/dryad.q9k8r> (Chapman, 2017b). The percent occurrence of the jet was  
849 computed by calculating the number of times a jet occurred in the daily files, dividing by the total number  
850 of days between January 1993 and December 2014, and multiplying by 100. ▾

851  
852 **Figure 8.** Estimated trend in the half-power point of CKE for each location shown in Figures 6 and 7, as a  
853 function of latitude. Error bars represent the 90% confidence interval. ▾

854  
855 **Figure 9.** SNR (trend/error in Figure 8). Values larger than 1 indicate a statistically significant northern  
856 shift. Values smaller than -1 indicate a statistically significant southern shift. Values between  $\pm 1$  indicate  
857 no statistically significant shift. ▾

858  
859

Don Chambers 10/10/2017 4:41 PM  
Formatted: Font:11 pt

Don Chambers 10/10/2017 4:37 PM  
**Deleted:** Positions of the T/P, Jason-1, and Jason-2 groundtracks used for this study (black lines), the approximate locations of the Subantarctic Front (red line) and the Polar Front (blue line), as well as locations where enhanced cross-track kinetic energy was found (orange dots). The front positions are from Orsi et al. (1995). ▾

Don Chambers 10/10/2017 4:37 PM  
**Deleted:** Figure 3. An example profile of mean CKE (1993-2015) along a ground track in the southern Indian Ocean, demonstrating the location of the half-power point and the locations of the southern and northern boundaries of the CKE bump. See text for details of the computations. ▾

Don Chambers 10/10/2017 4:38 PM  
**Deleted:** Figure 4. Examples of the three types of CKE profiles found (black lines), along with the value of the full EKE computed at crossover points. ▾

Don Chambers 10/10/2017 4:38 PM  
**Deleted:** Figure 5. Examples of the time-variable CKE profiles found, averaged over 3-year periods. The ground track is the same shown Figure 3 for the southern Indian Ocean. Colored dots indicate the location of probable jets in 2002-2004 (orange) and in 1999-2001 (blue). ▾

Don Chambers 10/10/2017 4:38 PM  
**Deleted:** Figure 6. Estimated trend in the half-power point of CKE for each location shown in Figure 2, as a function of latitude. Error bars represent the 90% confidence interval. ▾

Don Chambers 10/10/2017 4:39 PM  
**Deleted:** Figure 7. SNR (trend/error in Figure 6). Values larger than 1 indicate a statistically significant northern shift. Values smaller than -1 indicate a statistically significant southern shift. Values between  $\pm 1$  indicate no statistically significant shift. ▾

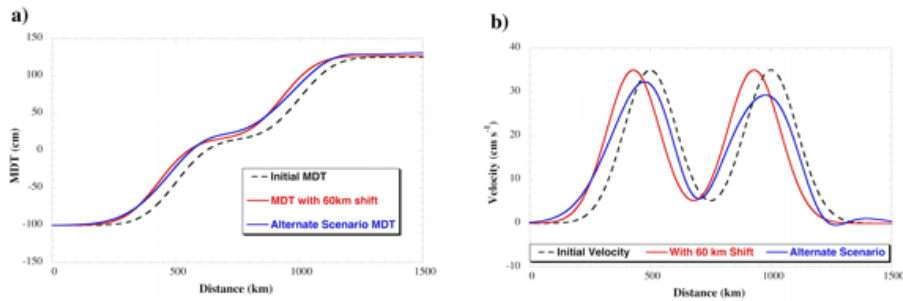

897  
898  
899  
900  
901  
902  
903  
904  
905  
906

**Figure 1.** a) Mean dynamic topography in the Southern Ocean along a north-south meridian for three scenarios, and b) the corresponding geostrophic velocity, with positive values indicating eastward flow. The scenarios are: an initial state (dashed black line), a shift of the two fronts south by 60 km with no change in magnitude or shape of the currents (red line), and no shift of the mean of the current, but a change in the magnitude and shape (blue line).

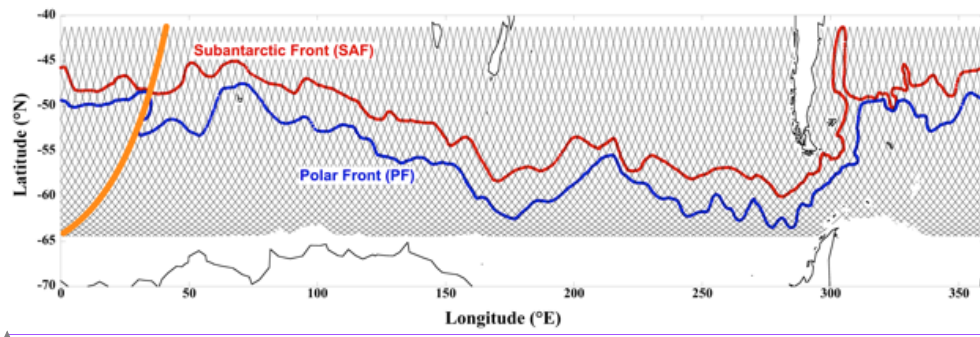

907  
908  
909  
910  
911  
912  
913  
914

**Figure 2.** Positions of the T/P, Jason-1, Jason-2 and Jason-3 groundtracks used for this study (black lines), and the approximate locations of the Subantarctic Front (red line) and the Polar Front (blue line) as estimated by Orsi et al. (1995). The orange track shows the location of the pass used in analysis shown in Figures 3 and 4.

Unknown  
Formatted: Font:Times

- Don Chambers 10/3/2017 1:04 PM  
**Deleted:** and
- Don Chambers 10/3/2017 1:04 PM  
**Moved (insertion) [2]**
- Don Chambers 10/3/2017 1:04 PM  
**Deleted:** .,
- Don Chambers 10/3/2017 1:04 PM  
**Deleted:** as well as locations where enhanced cross-track kinetic energy was found (orange dots).
- Don Chambers 10/3/2017 1:05 PM  
**Deleted:** The front positions are from
- Don Chambers 10/3/2017 1:04 PM  
**Moved up [2]:** Orsi et al. (1995).



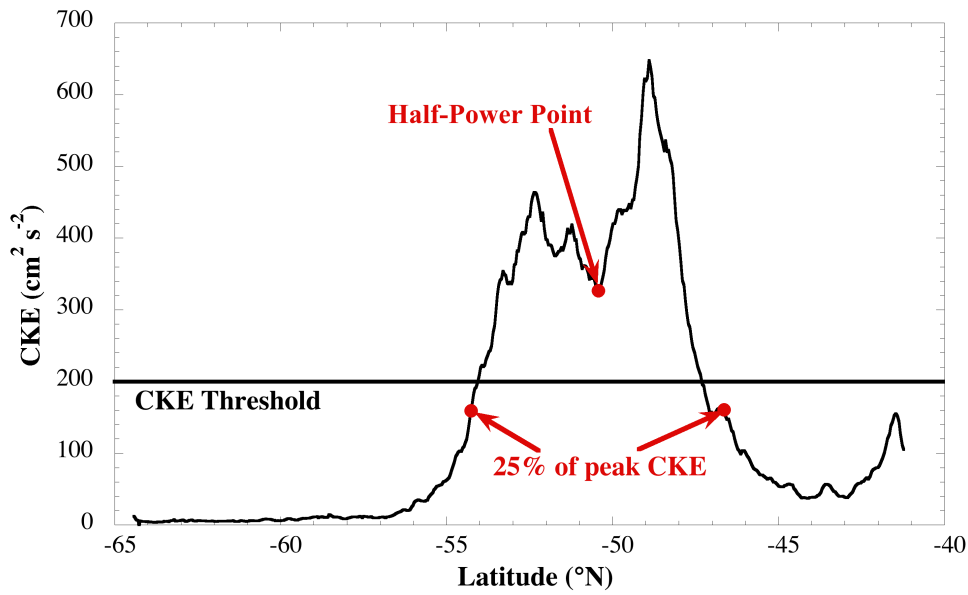

922  
 923  
 924  
 925  
 926  
 927  
 928  
 929

**Figure 3.** An example profile of mean CKE (1993-2015) along a ground track in the southern Indian Ocean (shown in orange in Figure 2), demonstrating the location of the half-power point and the locations of the southern and northern boundaries of the enhanced CKE envelope. See text for details of the computations.

Don Chambers 10/3/2017 1:07 PM  
 Deleted: bump

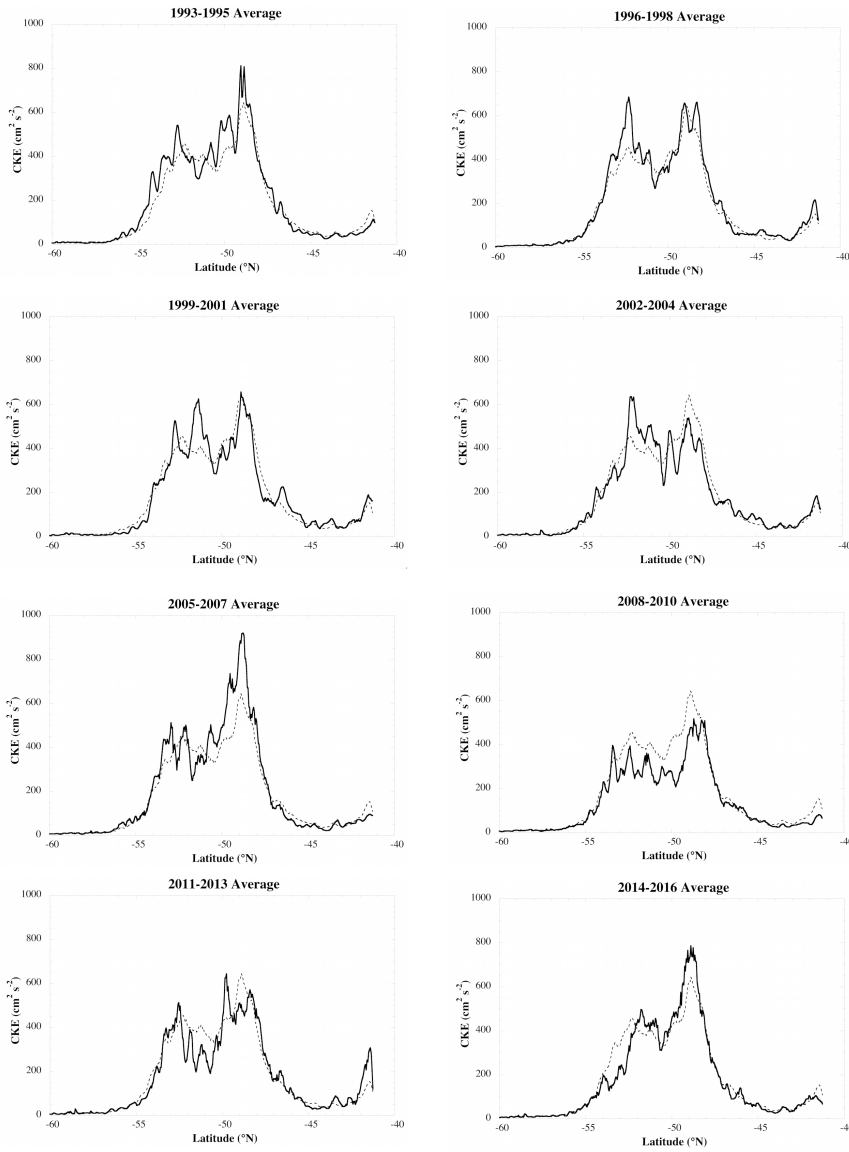

932  
933  
934

Figure 4. Three-year averages of CKE estimated along pass shown in Figure 2 (solid lines) along with the long-term mean from 1993-2016 (dotted line).

Unknown  
Formatted: Font:Times

Don Chambers 10/3/2017 1:10 PM  
Formatted: Font:Bold

935  
936

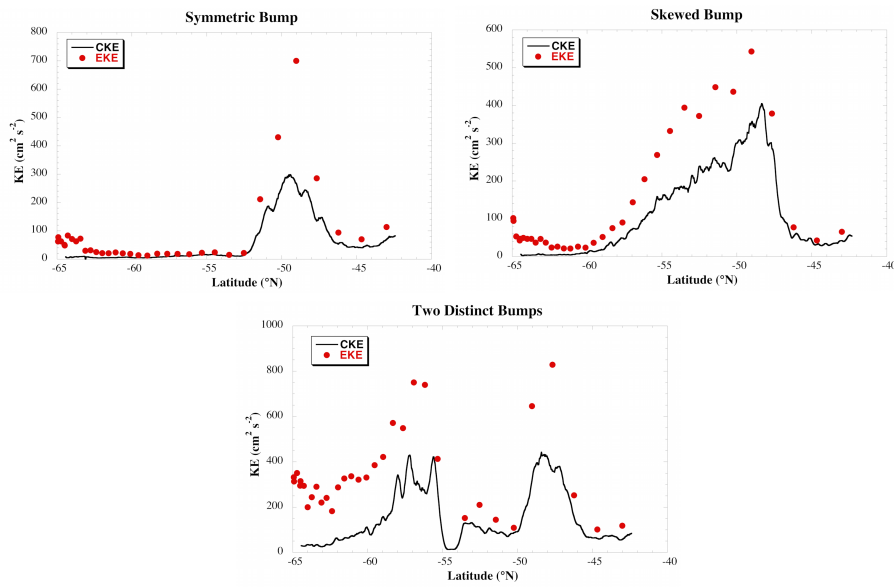

937  
938  
939  
940  
941  
942  
943

**Figure 5.** Examples of the three types of CKE profiles found (black lines), along with the value of the full EKE computed at crossover points.

Don Chambers 10/3/2017 1:11 PM  
Deleted: 4

945  
946

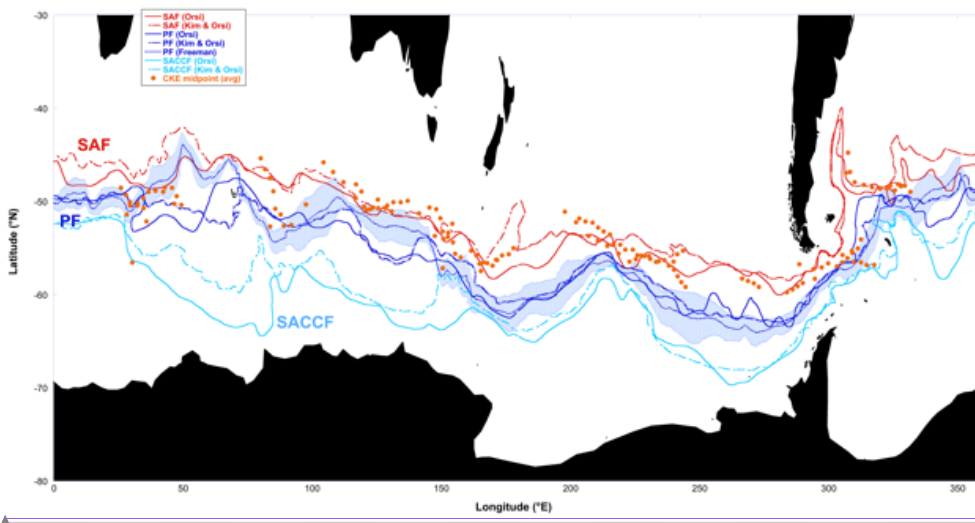

947  
948  
949  
950  
951  
952  
953  
954  
955  
956  
957

**Figure 6.** Mean positions of fronts estimated from CKE (orange dots) along with estimates from other authors: Orsi et al. (1995) computed using hydrographic sections, Kim and Orsi (2014) based on contours of dynamic topography, and Freeman and Lovenduski (2016a) based on gradients of sea surface temperature. The Orsi et al. (1995) fronts were downloaded from [https://gcmd.nasa.gov/records/AADC\\_southern\\_ocean\\_fronts.html](https://gcmd.nasa.gov/records/AADC_southern_ocean_fronts.html). The Freeman and Lovenduski fronts were downloaded from <https://doi.pangaea.de/10.1594/PANGAEA.855640> (Freeman and Lovenduski, 2016b). The Kim and Orsi (2014) fronts were provided by Yong Sun Kim upon request.

Unknown

Formatted: Font:Times

Don Chambers 10/3/2017 1:12 PM

Deleted: 5

Don Chambers 10/3/2017 1:12 PM

**Deleted:** Examples of the time-variable CKE profiles found, averaged over 3-year periods. The ground track is the same shown Figure 3 for the southern Indian Ocean. Colored dots indicate the location of probable jets in 2002-2004 (orange) and in 1999-2001 (blue).

965

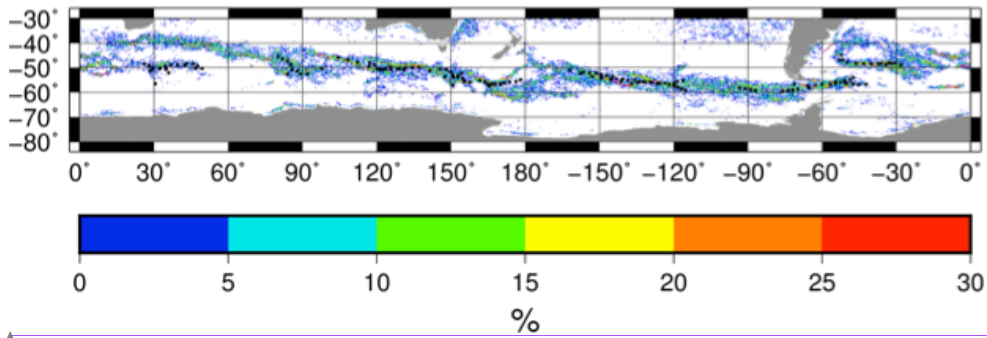

966

967

968

969

970

971

972

973

974

**Figure 7.** Mean positions of fronts estimated from CKE (black dots) along with the percent occurrence of a jet between 1993 and 2014 computed by Chapman (2017a). Data were downloaded from <http://dx.doi.org/10.5061/dryad.q9k8r> (Chapman, 2017b). The percent occurrence of the jet was computed by calculating the number of times a jet occurred in the daily files, dividing by the total number of days between January 1993 and December 2014, and multiplying by 100.

Unknown  
Formatted: Font:Times

975

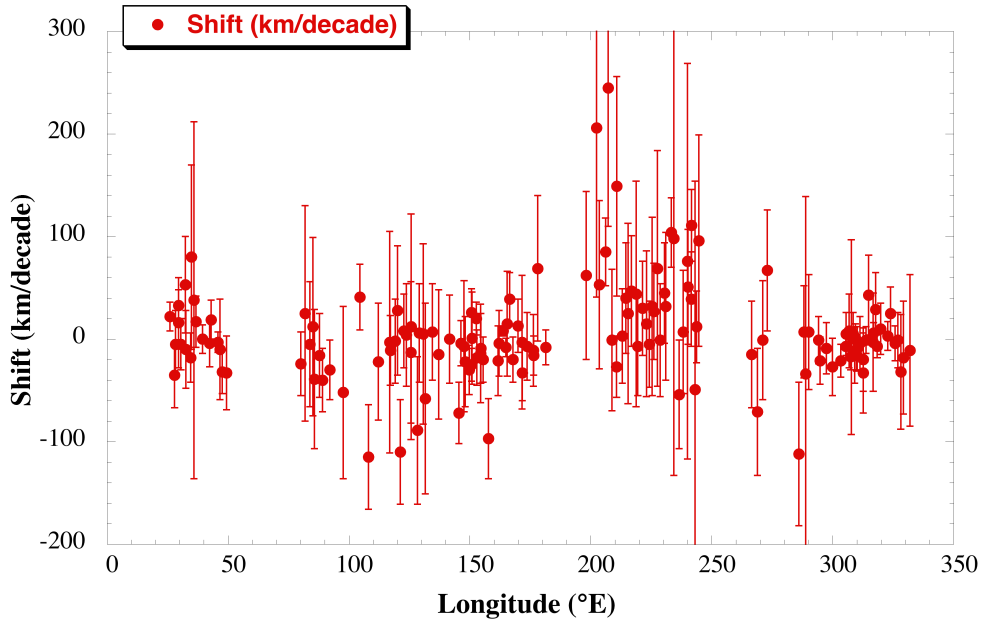

976  
977  
978  
979  
980

**Figure 8.** Estimated trend in the half-power point of CKE for each location shown in Figures 6 and 7, as a function of latitude. Error bars represent the 90% confidence interval.

Unknown  
Formatted: Font:Times, Bold

Don Chambers 10/5/2017 10:16 AM  
Deleted: 6

Don Chambers 10/5/2017 10:17 AM  
Deleted: 2

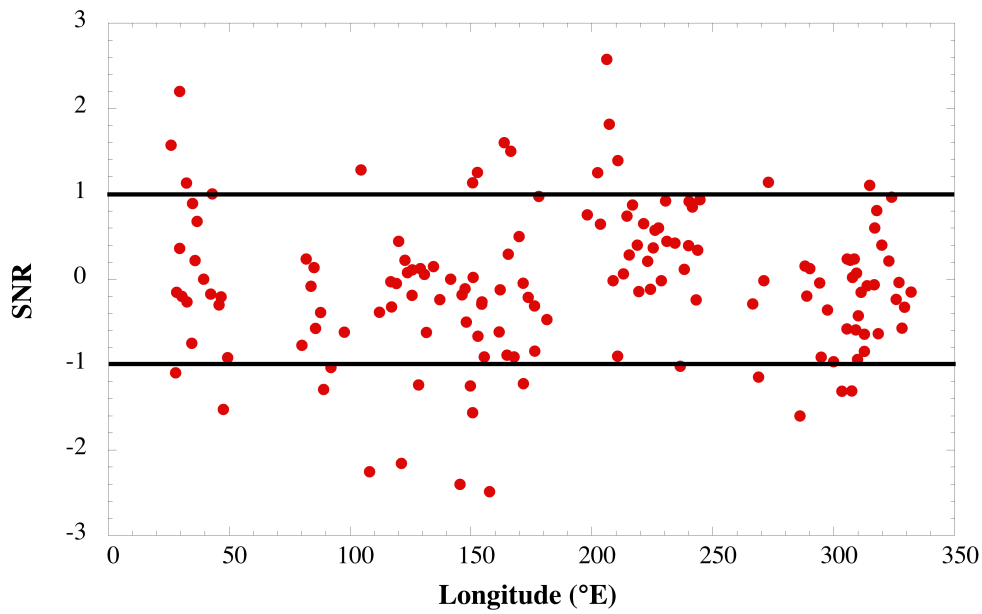

983  
984  
985  
986  
987  
988  
989

**Figure 9.** SNR (trend/error in Figure 8). Values larger than 1 indicate a statistically significant northern shift. Values smaller than -1 indicate a statistically significant southern shift. Values between  $\pm 1$  indicate no statistically significant shift.

Unknown  
Formatted: Font:Times

Don Chambers 10/5/2017 10:16 AM  
Deleted: 7  
Don Chambers 10/5/2017 10:16 AM  
Deleted: 6
